# Supplementary material for: Impact of Enhanced Recovery after Surgery with Preoperative Whey Protein-Infused Carbohydrate Loading and Postoperative Early Oral Feeding among Surgical Gynecologic Cancer Patients: An Open-Labelled Randomized Controlled Trial
Source: MDPI journal article supplement (doi:10.3390/nu12010264), 2020-01-20
Supplement: s1 [file s1]

**Table S1.** RECOvER checklist of items for reporting of ERAS compliance, outcomes and element research

|                            | Item | Recommendation                                                                                                                                                                                                                                                                                                                                                                                                                                                                                                                                                                                                                                                                                                                                                 | Page    |
|----------------------------|------|----------------------------------------------------------------------------------------------------------------------------------------------------------------------------------------------------------------------------------------------------------------------------------------------------------------------------------------------------------------------------------------------------------------------------------------------------------------------------------------------------------------------------------------------------------------------------------------------------------------------------------------------------------------------------------------------------------------------------------------------------------------|---------|
| <i>Title</i>               |      |                                                                                                                                                                                                                                                                                                                                                                                                                                                                                                                                                                                                                                                                                                                                                                |         |
| Title                      | 1    | Indicate that this is an enhanced recovery study in the title                                                                                                                                                                                                                                                                                                                                                                                                                                                                                                                                                                                                                                                                                                  | 1       |
| <i>Introduction</i>        |      |                                                                                                                                                                                                                                                                                                                                                                                                                                                                                                                                                                                                                                                                                                                                                                |         |
| Background                 | 2    | Explain the area of uncertainty that the study seeks to address                                                                                                                                                                                                                                                                                                                                                                                                                                                                                                                                                                                                                                                                                                | 2       |
| Guidelines                 | 3    | If a published set of enhanced recovery guidelines exists for this procedure, include a reference to the guidelines                                                                                                                                                                                                                                                                                                                                                                                                                                                                                                                                                                                                                                            | 3       |
| Outcomes                   | 4    | Define the primary outcome and any key prespecified secondary outcomes for the study                                                                                                                                                                                                                                                                                                                                                                                                                                                                                                                                                                                                                                                                           | 5       |
| <i>Methods</i>             |      |                                                                                                                                                                                                                                                                                                                                                                                                                                                                                                                                                                                                                                                                                                                                                                |         |
| IRB approval               | 5    | Give the institutional review board/ethics committee name and approval number. If permission was not required, reason should be stated                                                                                                                                                                                                                                                                                                                                                                                                                                                                                                                                                                                                                         | 3       |
| Study design               | 6    | Indicate what type of study is presented. The individual guidelines for the type of study should be followed                                                                                                                                                                                                                                                                                                                                                                                                                                                                                                                                                                                                                                                   | 3       |
| Setting                    | 7    | Described whether this is a single or multicentre study and provider                                                                                                                                                                                                                                                                                                                                                                                                                                                                                                                                                                                                                                                                                           | 3       |
| Timing                     | 8    | Describe periods of recruitment, time points at which outcomes assessed and follow up                                                                                                                                                                                                                                                                                                                                                                                                                                                                                                                                                                                                                                                                          | 3       |
| Participants               | 9    | Define study inclusion and exclusion criteria                                                                                                                                                                                                                                                                                                                                                                                                                                                                                                                                                                                                                                                                                                                  | 3       |
| Enhanced recovery protocol | 10   | Describe when the enhanced recovery protocol was implemented relative to the study period (ERAS protocol initiated in November 2017)                                                                                                                                                                                                                                                                                                                                                                                                                                                                                                                                                                                                                           | 3       |
|                            | 11   | Provide a flow diagram or table through the continuum of care detailing the enhanced recovery protocol including the following elements:<br>a) preadmission patient education regarding the protocol<br>b) preadmission screening and optimisation as indicated for nutritional deficiency, frailty, anemia, HbA1c, tobacco cessation and ethanol use<br>c) fasting and whey protein infused carbohydrate loading<br>d) preemptive analgesia (dose, route , timing)<br>e) antiemetic prophylaxis (dose, route, timing)<br>f) intraoperative fluid management strategy<br>g) types, doses and routes of anesthetics administrated<br>h) patient warming strategy<br>i) management of post-operative fluids<br>j) post-operative analgesic and anti-emetic plans | Table 1 |

|                              |    |                                                                                                                                                                            |                            |
|------------------------------|----|----------------------------------------------------------------------------------------------------------------------------------------------------------------------------|----------------------------|
|                              |    | k) plan for opioid minimization                                                                                                                                            |                            |
|                              |    | l) drain and line management                                                                                                                                               |                            |
|                              |    | m) early mobilization strategy                                                                                                                                             |                            |
|                              |    | n) post-operative diet and bowel regimen management                                                                                                                        |                            |
|                              |    | o) criteria for discharge                                                                                                                                                  |                            |
|                              |    | p) tracking of post-discharge outcomes                                                                                                                                     |                            |
| Enhanced recovery auditing   | 12 | All enhanced recovery elements charted by physician assistant into enhanced recovery interactive audit system                                                              | Not applicable             |
| Outcomes                     | 13 | Primary outcomes                                                                                                                                                           | 6                          |
|                              |    | Secondary outcomes                                                                                                                                                         | 6                          |
| PROs                         | 14 | Patient's questionnaires                                                                                                                                                   | Not applicable             |
| <i>Results</i>               |    |                                                                                                                                                                            |                            |
| Patient population           | 15 | Flow diagram to explain the deviation of study population                                                                                                                  | Figure 1                   |
|                              |    | a) Table with demographic and clinical features of study population                                                                                                        | Table 3 & table 4          |
|                              |    | b) Number of participants with missing data for each variable of interest                                                                                                  | Table 5, table 6 & table 7 |
| Enhanced recovery compliance | 16 | Table with average compliance for each enhanced recovery protocol element and present a comparison of the variation in enhanced recovery compliance among the study groups | Table 2                    |
| Correlations                 | 17 | Logistic regression to correlate the change in primary outcomes with study intervention                                                                                    | Not applicable             |
| <i>Discussion</i>            |    |                                                                                                                                                                            |                            |
| Context                      | 18 | Explain the study adds to the body of knowledge regarding the study intervention within the context of enhanced recovery after surgery care                                | 11                         |
| Limitations                  | 19 | Discuss the limitations of the study and how these might temper the findings                                                                                               | 12                         |
| Other information            |    |                                                                                                                                                                            |                            |
| Funding                      | 20 | Support from departmental grant. No external grant in this study                                                                                                           | 12                         |

\*RECOvER checklist [23]. ERAS: Enhanced Recovery after Surgery.
